# Supplementary material for: PD 0332991, a selective cyclin D kinase 4/6 inhibitor, sensitizes lung cancer cells to treatment with epidermal growth factor receptor tyrosine kinase inhibitors
Source: PubMed Central journal article supplement (PMC5356711; doi:10.18632/oncotarget.13069), 2016-11-04
Supplement: oncotarget-07-84951-s001.pdf [file oncotarget-07-84951-s001.pdf]

## PD 0332991, a selective cyclin D kinase 4/6 inhibitor, sensitizes lung cancer cells to treatment with epidermal growth factor receptor tyrosine kinase inhibitors

### SUPPLEMENTARY FIGURES AND TABLES

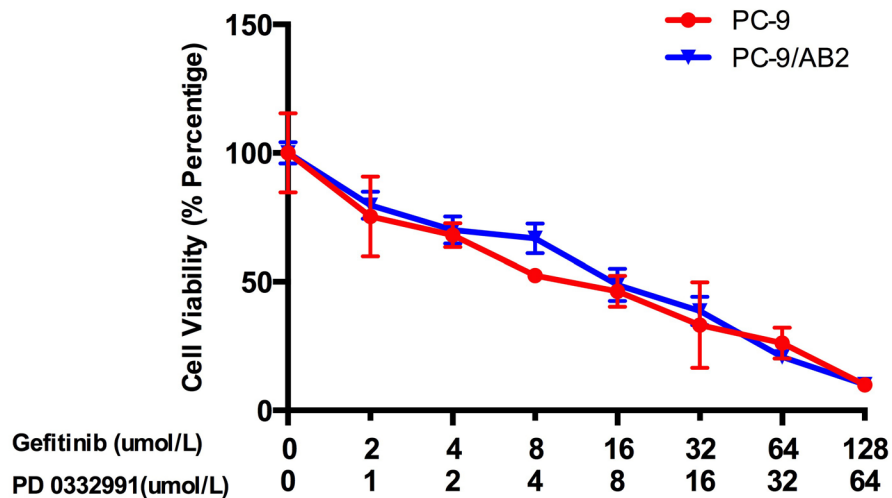

**Supplementary Figure S1: Synergistic effect between PD 0332991 and gefitinib in PC-9 and PC-9/AB2 cells.** Cells were treated with various concentrations of gefitinib in combination with PD 0332991 for 24 hr, and cell viability was measured by MTT assay.

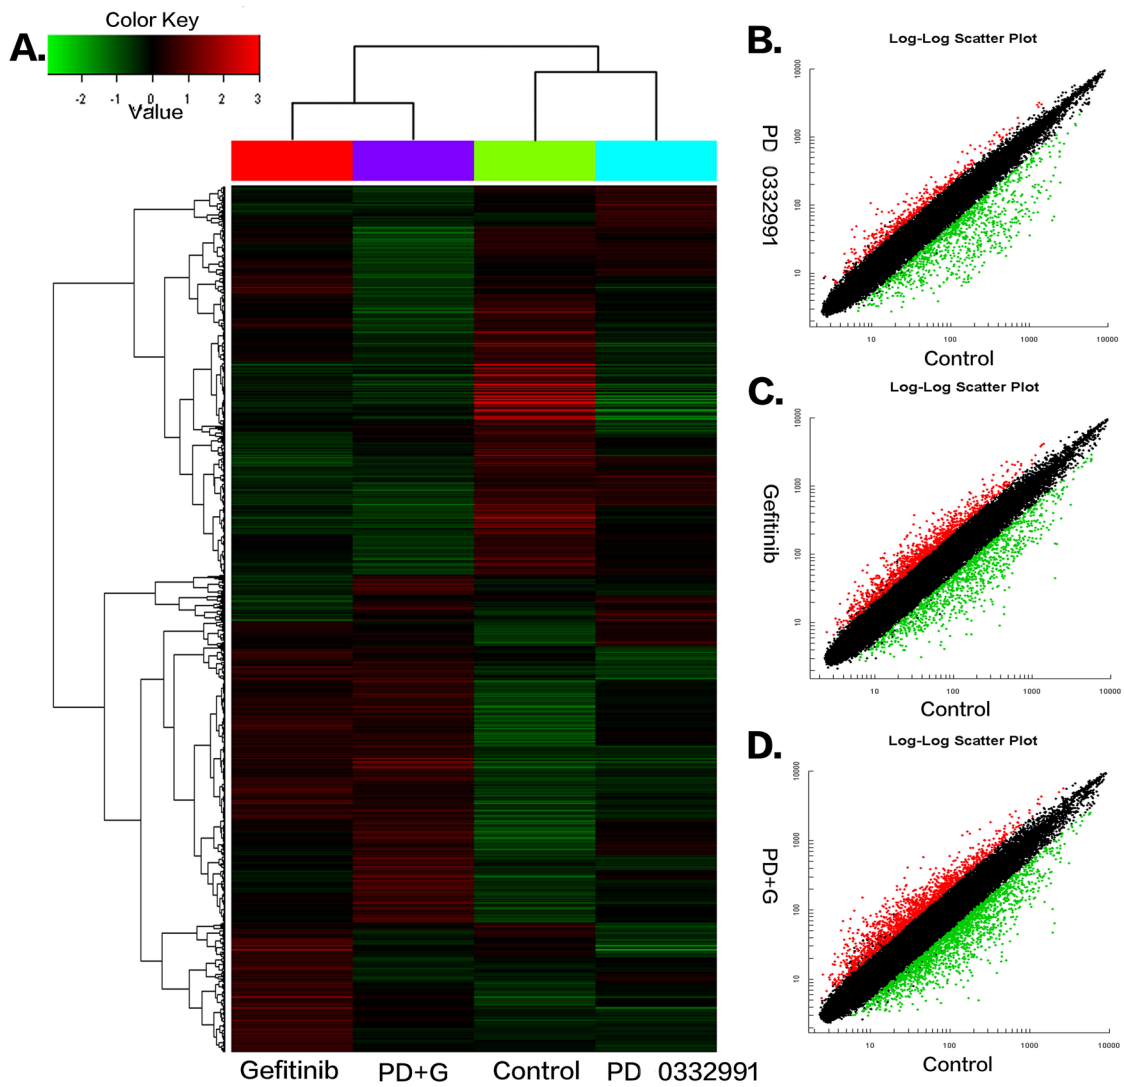

**Supplementary Figure S2: Microarray analysis data in PC-9/AB2 cells treated with PD 0332991 and/or gefitinib. A.** The heat map of alterations of gene expression in PC-9/AB2 treated with PD 0332991, gefitinib, or the combination of PD 0332991 and gefitinib. **B-D.** Scatter plot showing the comparison of PD 0332991, gefitinib, and PD+G group gene changes as compared with the control group.

**A.**

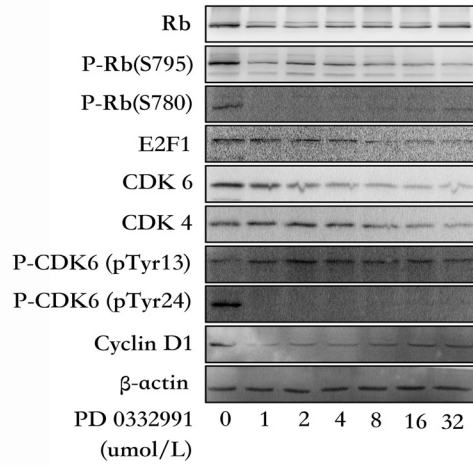

**B.**

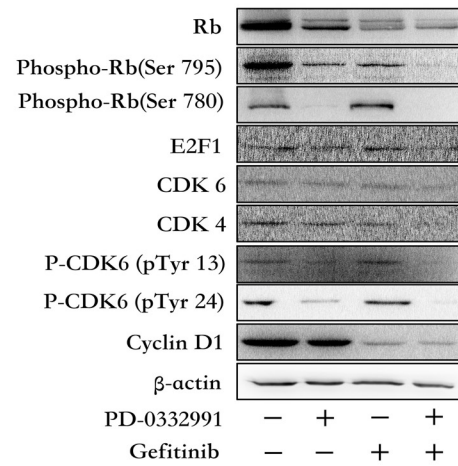

**Supplementary Figure S3: Different doses of PD 0332991 and the effects of 1 μmol/L PD 0332991 combined with 16 μmol/L gefitinib in PC/AB2 cells.** **A.** PC-9/AB2 cells were treated with different doses of PD 0332991 for 24 hr, which caused changes in the pRb-E2F1 pathway. **B.** The effects on the pRb-E2F1 pathway after 24 hr treatment with a combination of 1 μmol/L PD 0332991 and 16 μmol/L gefitinib in PC-9/AB2 cell lines.

**Supplementary Table S1: The primer sequences for real-time PCR used to verify the results of gene expression changes found in the microarray analysis**

| Gene symbol | Forward primer            | Reverse primer           |
|-------------|---------------------------|--------------------------|
| RB1         | ATCACAGCGATACAAACTTGGAG   | AGCGCACGCCAATAAAGACA     |
| E2F1        | ACGTGACGTGTCAGGACCT       | GATCGGGCCTTGTTTGCTCT     |
| Cyclin-D1   | GCTGGAGCCCGTGAAAAAGA      | CTCCGCCTCTGGCATTITG      |
| MAD2L1      | GGACTCACCTTGCTTGTAACACTAC | GATCACTGAACGGATTTTCATCCT |
| CDC25A      | CTCCTCCGAGTCAACAGATTCA    | CAACAGCTTCTGAGGTAGGGA    |
| RAD21       | AAGCCAAATACCTTCTTGCAGAC   | CTGCTTCCCGATTTTCTCAG     |
| MCM3        | GGCCTCCATTGATGCTACCTA     | ACTTTGGGACGAACTAGAGAACA  |
| MCM5        | AGCATTTCGTAGCCTGAAGTCG    | CGGCACTGGATAGAGATGCG     |
| CDC25B      | GCATGGAGAGTCTCATTAGTGC    | CTCCGCCTCCGCTTATTCT      |
| MCM6        | TCGGGCCTTGAAAACATTCGT     | TGTGTCTGGTAGGCAGGTCTT    |
| MCM2        | ATGGCGGAATCATCGGAATCC     | GGTGAGGGCATCAGTACGC      |
| PLK1        | CACCAGCACGTCGTAGGATTC     | CCGTAGGTAGTATCGGGCCTC    |
| CCNB2       | TGCTCTGCAAATCGAGGACA      | GCCAATCCACTAGGATGGCA     |
| CDC20       | GCACAGTTCGCGTTCGAGA       | CTGGATTTGCCAGGAGTTCGG    |
| CCNA2       | GGATGGTAGTTTTGAGTCACCAC   | CACGAGGATAGCTCTCATACTGT  |
| PTTG1       | ACCCGTGTGGTTGCTAAGG       | ACGTGGTGTGAACTTGAGAT     |
| GADD45A     | GAGAGCAGAAGACCGAAAGGA     | CACAACACCACGTTATCGGG     |
| BUB1B       | AAATGACCCTCTGGATGTTTGG    | GCATAAACGCCCTAATTTAAGCC  |
| CDC6        | ACCTATGCAAACTCCCCATT      | TGGCTAGTTCTCTTTTGCTAGGA  |
| CDKN2C      | GGGGACCTAGAGCAACTTACT     | CAGCGCAGTCCTTCCAAAT      |
| DBF4        | GGGCAAAGAGTTGGTAGTGG      | ACTTATCGCCATCTGTTTGGATT  |
| CDK2        | CCAGGAGTTACTTCTATGCCTGA   | TTCATCCAGGGGAGGTACAAC    |
| CDC7        | AGTGCCTAACAGTGGCTGG       | CACGGTGAACAATACCAAAGTGA  |
| MCM7        | CCTACCAGCCGATCCAGTCT      | CCTCCTGAGCGGTTGGTTT      |
| MCM4        | TGAACCTCTATACATGCAACGAC   | CAGGGTAACGGTCAAAGAAGATT  |
| WEE1        | AGGGAATTTGATGTGCGACAG     | CTTCAAGCTCATAATCACTGGCT  |

**Supplementary Table S2: Clinical characteristics of patients with *EGFR* mutations**

| No. | Gender | Ages | EGFR Mutation | Stage | Information of EGFR-TKIs                 |
|-----|--------|------|---------------|-------|------------------------------------------|
| 1.  | Female | 51   | Del19         | IV    | Gefitinib 12 months (No drug resistance) |
| 2.  | Male   | 52   | Del19         | IV    | Gefitinib 14 months (Drug resistance)    |
| 3.  | Male   | 26   | Del19         | IV    | Gefitinib 5 months (No drug resistance)  |
| 4.  | Female | 51   | L858R         | IV    | Gefitinib 15 months (No drug resistance) |

Four patients with *EGFR* Mutations are all IV stage lung cancer. The gender of the patients is two female and two male. Three patients had Del19 mutations and one had an L858R mutation. They all had been treated with gefitinib for several months.

Supplementary Table S3: The treatment pipeline of the patient with EGFR-TKI acquired resistance using PD 0332991

| Time            | Treatment pipeline                                                                                   |
|-----------------|------------------------------------------------------------------------------------------------------|
| 2013-10-16      | Right upper lobectomy, Adenocarcinoma (pT2N2M0, IIIA), EGFR 19 exon deletion                         |
| 2013-12~2014-02 | Pemetrex + Cisplatin, 4 cycles                                                                       |
| 2014-03         | Mediastinal radiotherapy (5000Gy)                                                                    |
| 2014-08-12      | Lung and bone metastasis, start to take Iressa (250mg PO daily) and zoledronic acid infusion monthly |
| 2015-04-11      | Brain metastasis, indicating drug resistance of Iressa                                               |
| 2015-05-02      | Start to take PD-0332991 (100mg PO) +Iressa (250mg PO daily)                                         |
| 2015-05-26      | Brain metastasis is barely detected.                                                                 |
